# Supplementary material
Source: PubMed Central journal article supplement (PMC3814736)

## Supplemental Methods

### Reagents

Ac-YVAD-CHO (ALX-260-027) was purchased from Enzo Life Sciences (Farmingdale, NY, USA). Recombinant human TNF $\alpha$  (#210-TA) and IL-1 $\beta$  (#201-LB) were purchased from R&D Systems (Minneapolis, MN, USA). Actinomycin D (A9415) was purchased from Sigma-Aldrich (St. Louis, MO, USA).

### Quantifying mRNA decay

mRNA decay quantification was performed as previously described.<sup>17</sup> Specifically, Actinomycin D (5  $\mu$ g/mL) was added to cells pretreated for 18 h with 30  $\mu$ M R848, with or without the presence of BIRB 796 (50 nM) for the latter 12 h. Total RNA was prepared at regular time intervals thereafter. *IL-1 $\beta$*  mRNA was quantified using real-time qRT-PCR.

Primers and TaqMan probes for the 3' UTR sequences of *IL-1 $\beta$*  and *TNF $\alpha$*  were designed using Primer Express Version 3.0 software (Life Technologies, Carlsbad, CA, USA) and were as follows: *IL-1 $\beta$* : probe 6-FAM-CGGCCACATTTGG-MGB; 5' primer TTAAAGCCCGCCTGACAGA; 3' primer GCGAATGACAGAGGGTTTCTTAGA; and *TNF $\alpha$* : probe 6-FAM-CCGTGAAAACGGAGCT-MGB; 5' primer TGCCTTGGCTCAGACATGTTT; 3' primer GCTACATGGGAACAGCCTATTGT. Primers and probe were purchased from Life Technologies.

### Immunoprecipitation

Immunoprecipitations were performed as previously described.<sup>16</sup>

**BIO treatment**

A total of 200 000 cells/200  $\mu$ L (T-shNT or T-shFC) were cultured in 96-well plates, pretreated with BIO (6-bromoindirubin-3'-oxime; 0.2-2  $\mu$ M) for 2 h, and then treated with R848 (30  $\mu$ M) for 24 h, after which culture supernatants were assayed for IL-1 $\beta$  using Quantikine ELISA Kits (R&D Systems).

## Supplemental Figures

**Figure S1. TLR-induced overproduction of IL-1 $\beta$  by FANCC-deficient cells is suppressed by the caspase-1 inhibitor YVAD.** T-shNT and T-shFC cells were plated at a concentration of  $10^6$ /mL, pretreated with Ac-YVAD-CHO (YVAD; 50  $\mu$ M) for 6 h, and stimulated with R848 (30  $\mu$ M) for 24 h. Secreted IL-1 $\beta$  (A) and TNF $\alpha$  (B) were measured in the conditioned media by ELISA.

A

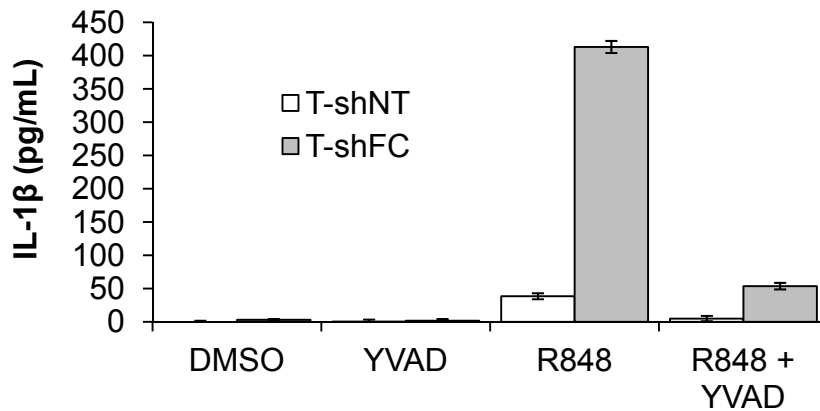

B

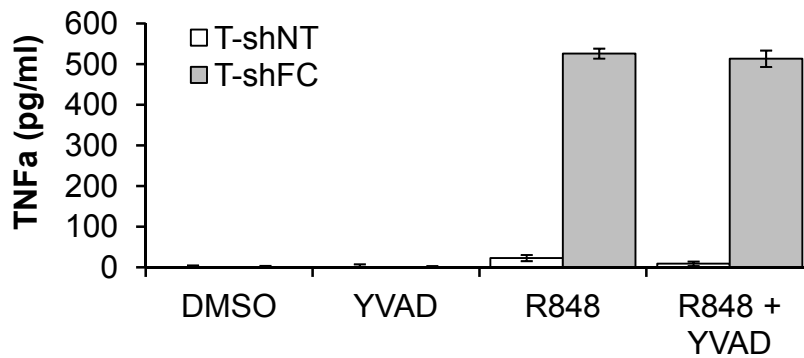

**Figure S2. TLR-induced overproduction of IL-1 $\beta$  by FA patient CD14<sup>+</sup> cells is suppressed by the inflammasome inhibitor glyburide.** CD14<sup>+</sup> cells from a FA complementation group A patient were isolated from peripheral blood mononuclear cells using magnetic microbeads. Cells were plated at a concentration of 50 000/mL, pretreated with glyburide (Glyb; 50  $\mu$ M) for 6 h, and stimulated with the indicated doses ( $\mu$ M) of R848 for 24 h. Secreted IL-1 $\beta$  was measured in the conditioned media by ELISA. R1 indicates R848 1  $\mu$ M, R3 indicates R848 3  $\mu$ M, R5 indicates R848 5  $\mu$ M, and R10 indicates R848 10  $\mu$ M.

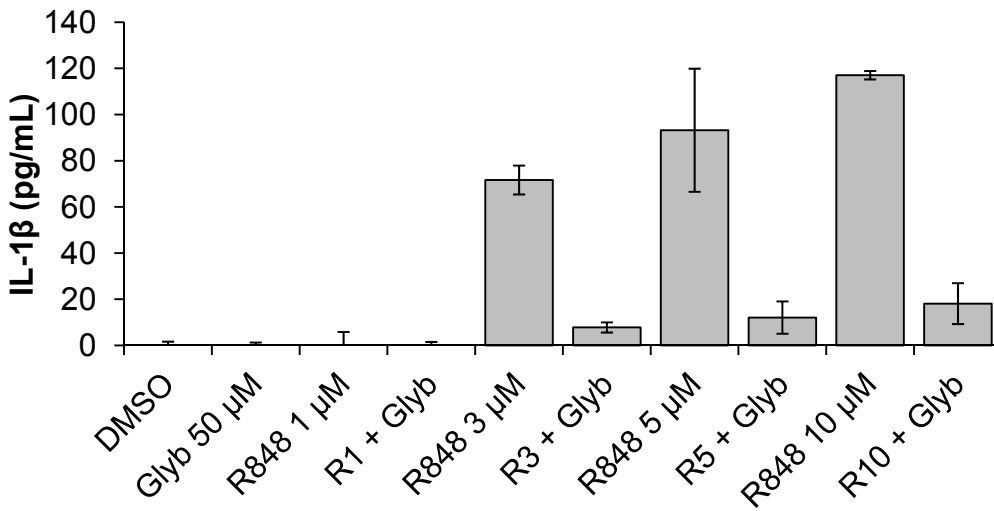

**Figure S3. Inhibition of p38 MAP kinase does not reduce the half-life of *IL-1 $\beta$*  and *TNF $\alpha$*  mRNA.** T-shFC cells were plated at a concentration of  $10^6$ /mL and treated with R848 (30  $\mu$ M) for 6 h before addition of BIRB 796 (BIRB; 50 nM) for 12 h. Actinomycin D (5  $\mu$ g/mL) was then added to the cultures. Total RNA was harvested at 0, 30, 60, 120, and 180 minutes after actinomycin D treatment. *IL-1 $\beta$*  (A) and *TNF $\alpha$*  (B) mRNA were quantified using real-time qRT-PCR and normalized to levels of 18S rRNA.

A

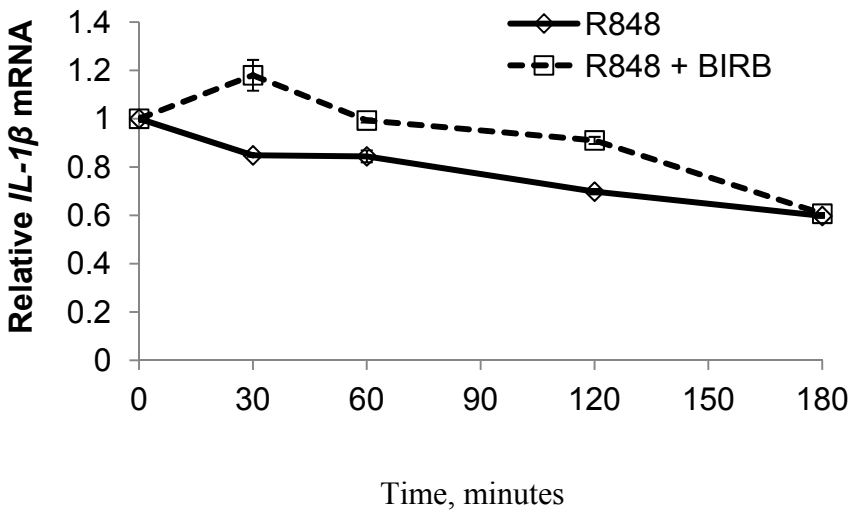

B

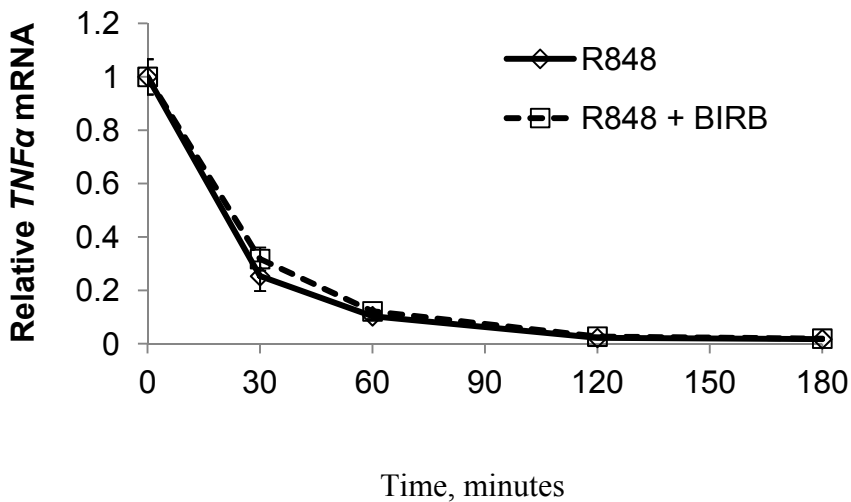

**Figure S4. TNF $\alpha$  enhances R848-induced IL-1 $\beta$  in THP-1 cells, but IL-1 $\beta$  does not enhance R848-induced TNF $\alpha$ .** (A) T-shNT and T-shFC cells were plated at a concentration of  $10^6$ /mL and treated with R848 (30  $\mu$ M), with and without recombinant human TNF $\alpha$  (rhTNF $\alpha$ ; 2 ng/mL) for 24 h. Secreted IL-1 $\beta$  was measured in the conditioned media by ELISA. *P* values were calculated using a paired Student *t* test. (B) T-shNT and T-shFC cells were plated at a concentration of  $10^6$ /ml and treated with R848 (30  $\mu$ M), with and without the indicated doses of recombinant human IL-1 $\beta$  (rhIL-1 $\beta$ ; 0, 1, 10, or 100 ng/mL) for 24 h. Secreted TNF $\alpha$  was measured in the conditioned media by ELISA.

**A**

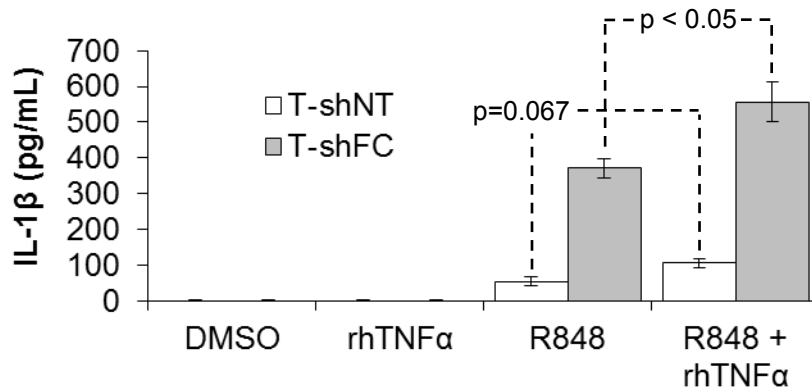

**B**

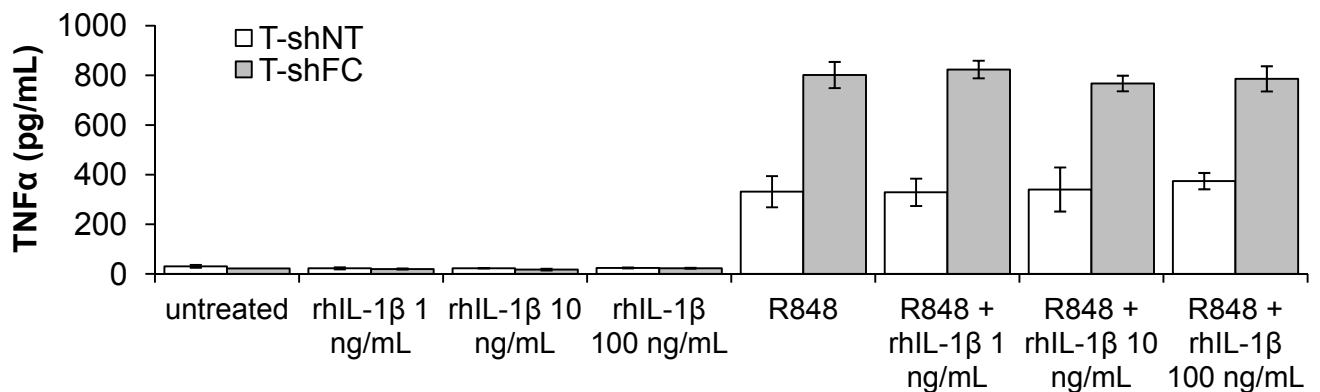

Supplement: supp_blood-2013-02-484816_blood-2013-02-484816-1.pdf [file supp_blood-2013-02-484816_blood-2013-02-484816-1.pdf]
